# Supplementary material for: Serum Lowers Bioactivity and Uptake of Synthetic Amorphous Silica by Alveolar Macrophages in a Particle Specific Manner
Source: PubMed Central journal article supplement (PMC7999370; doi:10.3390/nano11030628), 2021-03-03
Supplement: nanomaterials-11-00628-s001.pdf [file nanomaterials-11-00628-s001.pdf]

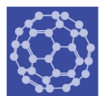

## Supplementary Materials

# Serum Lowers Bioactivity and Uptake of Synthetic Amorphous Silica by Alveolar Macrophages in a Particle Specific Manner

Martin Wiemann <sup>1,\*</sup>, Antje Vennemann <sup>1</sup>, Cornel Venzago <sup>2</sup>, Gottlieb-Georg Lindner <sup>3</sup>, Tobias B. Schuster <sup>2</sup> and Nils Krueger <sup>2</sup>

<sup>1</sup> IBE R&D Institute for Lung Health gGmbH, Mendelstr. 11, D-48149 Münster, Germany; vennemann@ibe-ms.de

<sup>2</sup> Evonik Operations GmbH, Rodenbacher Chaussee 4, 63457 Hanau-Wolfgang, Germany; cornel.venzago@evonik.com (C.V.); tobias.schuster@evonik.com (T.B.S.); nils.krueger@evonik.com (N.K.)

<sup>3</sup> Evonik Operations GmbH, Brühler Straße 2, 50389, Wesseling, Germany; gottlieb-georg.lindner@evonik.com (G.-G.L.)

\* Correspondence: martin.wiemann@ibe-ms.de; Tel.: +49 251 9802340

### Calculation of Mean Cellular Particle Burden as used in Figure 8

To calculate the mean cellular burden under the conditions of the macrophage model the totally applied dose of particles per well of a 96-well plate is calculated from the particle concentration per mL multiplied by 0.2, divided by the initial number of cells in the vial, which is  $3 \times 10^5$  cells/well und serum-free conditions. Provided that the material is taken up completely by the cells, the concentration range of 11.25, 22.5, 45 and 90  $\mu\text{g/mL}$ , may then be converted to a mean cellular burden of 7.5, 15, 30 and 60 pg/cell, respectively. To obtain the cellular burden shown in Figure 8 (abscissa values) each mean cellular burden was multiplied by the percentage of ingested particles found for the lowest concentration only. Importantly, this concentration was non-toxic (10% FCS added) or nearly non-toxic (protein-free). A direct measurement of the particle load over the whole concentration range would have caused progressive cell lysis, counteracting the isolation of particle-laden cells and subsequent measurements of cell-associated silica. The calculation used here circumvents this problem but should be understood as an approximation.

**Table S1.** Hydrodynamic diameter of SAS in H<sub>2</sub>O and cell culture media.

| Material              | Fluid            | %FCS | Hydrodynamic Diameter [nm] |              |              |              |              |      |
|-----------------------|------------------|------|----------------------------|--------------|--------------|--------------|--------------|------|
|                       |                  |      | Mean ± SEM                 | Mode ± SEM   | d10 ± SEM    | d50 ± SEM    | d90 ± SEM    |      |
| <b>AEROSIL® 380 F</b> | H <sub>2</sub> O | 0    | n.d.                       | n.d.         | n.d.         | n.d.         | n.d.         | n.d. |
|                       | KRPG             | 0    | 151.7 ± 0.6                | 104.0 ± 2.7  | 90.3 ± 1.5   | 135.7 ± 0.4  | 223.8 ± 3.2  |      |
|                       | KRPG             | 10   | 163.2 ± 1.5                | 112.8 ± 1.3  | 99.5 ± 0.7   | 132.3 ± 1.7  | 256.7 ± 3.0  |      |
|                       | F-12K            | 0    | 168.5 ± 2.3                | 134.2 ± 9.6  | 110.2 ± 2.2  | 154.3 ± 2.1  | 230.8 ± 7.3  |      |
|                       | F-12K            | 10   | 436.3 ± 5.4                | 457.7 ± 30.3 | 247.6 ± 6.8  | 442.0 ± 9.6  | 593.3 ± 14.1 |      |
| <b>AEROSIL® OX50</b>  | H <sub>2</sub> O | 0    | 184.0 ± 1.8                | 178.1 ± 7.2  | 122.5 ± 1.2  | 170.9 ± 2.4  | 247.2 ± 5.1  |      |
|                       | KRPG             | 0    | 367.5 ± 12.4               | 365.5 ± 37.6 | 218.9 ± 14.8 | 363.2 ± 13.8 | 493.9 ± 5.7  |      |
|                       | KRPG             | 10   | 214.8 ± 0.6                | 200.6 ± 12.8 | 140.8 ± 1.0  | 201.0 ± 3.9  | 287.5 ± 2.8  |      |
|                       | F-12K            | 0    | 198.4 ± 0.6                | 159.7 ± 5.0  | 135.3 ± 0.7  | 182.8 ± 0.7  | 263.8 ± 1.3  |      |
|                       | F-12K            | 10   | 217.8 ± 2.2                | 190.0 ± 8.0  | 145.9 ± 4.5  | 202.9 ± 1.2  | 290.6 ± 2.4  |      |
| <b>SIPERNAT® 50</b>   | H <sub>2</sub> O | 0    | 238.7 ± 3.3                | 172.4 ± 2.3  | 147.2 ± 2.1  | 200.9 ± 4.1  | 373.3 ± 6.8  |      |
|                       | KRPG             | 0    | 227.6 ± 5.5                | 174.9 ± 3.4  | 138.4 ± 3.5  | 190.0 ± 5.5  | 363.2 ± 11.4 |      |
|                       | KRPG             | 10   | 248.0 ± 0.9                | 181.9 ± 7.3  | 157.0 ± 3.8  | 212.8 ± 2.2  | 378.7 ± 0.6  |      |
|                       | F-12K            | 0    | 251.3 ± 0.7                | 164.7 ± 0.3  | 146.6 ± 1.2  | 217.5 ± 4.5  | 410.1 ± 12.7 |      |
|                       | F-12K            | 10   | 258.2 ± 2.6                | 185.1 ± 6.8  | 154.4 ± 2.4  | 216.9 ± 4.3  | 419.6 ± 2.5  |      |
| <b>SIPERNAT® 160</b>  | H <sub>2</sub> O | 0    | 212.5 ± 0.8                | 146.4 ± 3.4  | 127.6 ± 0.7  | 180.5 ± 2.1  | 325.8 ± 2.0  |      |
|                       | KRPG             | 0    | 269.2 ± 11.1               | 188.1 ± 3.6  | 165.5 ± 6.1  | 241.3 ± 11.7 | 415.4 ± 18.0 |      |
|                       | KRPG             | 10   | 276.9 ± 6.0                | 194.7 ± 10.0 | 165.5 ± 3.2  | 248.5 ± 2.9  | 421.1 ± 6.8  |      |
|                       | F-12K            | 0    | 226.2 ± 5.3                | 173.7 ± 11.0 | 138.6 ± 1.8  | 194.6 ± 5.6  | 344.4 ± 14.6 |      |
|                       | F-12K            | 10   | 235.6 ± 3.9                | 182.2 ± 5.5  | 141.0 ± 2.5  | 202.5 ± 3.7  | 356.7 ± 12.6 |      |

Footnote to Table S1. Values for d10, d50, d90 describe the cumulative particle size distribution at 10%, 50% and 90% of the maximum value. Particle concentration was 9 µg/mL in all measurements. n.d.: particles not detectable.

**Table S2.** Trypan Blue exclusion test and cell numbers of SAS-treated cells used for mass spectrometric determination of the cell-associated SiO<sub>2</sub> mass.

| Material       | Effects of SAS Treatment |              |            |              |
|----------------|--------------------------|--------------|------------|--------------|
|                | Serum-free               |              | 10 % Serum |              |
|                | cells/mL                 | % dead cells | cells/mL   | % dead cells |
| Control Cells  | 345,000                  | 3.6          | 490,000    | 1.5          |
| SIPERNAT® 160  | 420,000                  | 9.4          | 632,500    | 1.2          |
| SIPERNAT® 50   | 480,000                  | 7.3          | 630,000    | 2.4          |
| AEROSIL® OX50  | 400,000                  | 4.2          | 592,500    | 2.5          |
| AEROSIL® 380 F | 447,500                  | 10.6         | 662,500    | 1.5          |

Footnote to Table S2. Values are means from values measured in duplicates.

**Table S3.** Numerical values from in vitro tests with the Alveolar Macrophage Model.

| Material       | [µg/mL] | LDH [% pos. Control] |                | GLU [% pos. Control] |                | H <sub>2</sub> O <sub>2</sub> [µg/mL] |                | TNFα [pg/mL]     |                 |
|----------------|---------|----------------------|----------------|----------------------|----------------|---------------------------------------|----------------|------------------|-----------------|
|                |         | w/o FCS              | 10 % FCS       | w/o FCS              | 10 % FCS       | w/o FCS                               | 10 % FCS       | w/o FCS          | 10 % FCS        |
| AEROSIL® 380 F | 0       | 13.4 ± 2.7           | 14.5 ± 3.0     | 1.7 ± 0.5            | 1.7 ± 1.7      | 0.9 ± 0.2                             | 0.8 ± 0.1      | 14.3 ± 14.7      | 16.7 ± 8.9      |
|                | 11.25   | 32.5 ± 2.9 ***       | 13.2 ± 2.3     | 4.1 ± 0.7 *          | 1.6 ± 0.6      | 1.2 ± 0.1                             | 0.8 ± 0.2      | 42.5 ± 11.1      | 13.1 ± 7.0      |
|                | 22.5    | 86.4 ± 3.2 ***       | 13.5 ± 1.9     | 12.9 ± 1.1 ***       | 2.0 ± 0.5      | 1.2 ± 0.1                             | 0.6 ± 0.5      | 132.5 ± 17.2 *** | 17.0 ± 7.3      |
|                | 45      | 103.9 ± 6.4 ***      | 16.8 ± 1.5     | 18.8 ± 0.9 ***       | 3.1 ± 0.7      | 1.4 ± 0.1                             | 0.9 ± 0.2      | 140.1 ± 36.7 *** | 20.0 ± 5.8      |
|                | 90      | 100.8 ± 5.1 ***      | 24.5 ± 2.8 **  | 19.1 ± 0.7 ***       | 7.5 ± 0.9 ***  | 1.9 ± 0.2 ***                         | 0.9 ± 0.2      | 126.1 ± 44.7 *** | 43.7 ± 5.0      |
| AEROSIL® OX50  | 0       | 13.4 ± 2.7           | 14.5 ± 3.0     | 1.7 ± 0.5            | 1.7 ± 1.7      | 0.9 ± 0.2                             | 0.8 ± 0.1      | 14.3 ± 14.7      | 16.7 ± 8.9      |
|                | 11.25   | 12.6 ± 2.3           | 13.0 ± 2.2     | 1.6 ± 0.4            | 1.4 ± 0.6      | 1.0 ± 0.2                             | 0.9 ± 0.1      | 15.6 ± 13.5      | 14.6 ± 6.1      |
|                | 22.5    | 17.9 ± 3.2           | 14.6 ± 2.4     | 2.2 ± 0.4            | 1.3 ± 0.9      | 1.2 ± 0.0                             | 1.0 ± 0.2      | 20.3 ± 15.7      | 13.0 ± 7.0      |
|                | 45      | 70.8 ± 9.5 ***       | 16.1 ± 2.6     | 10.5 ± 1.6 ***       | 2.2 ± 1.2      | 1.2 ± 0.1                             | 0.9 ± 0.3      | 84.9 ± 22.6 ***  | 15.9 ± 4.6      |
|                | 90      | 100.4 ± 3.0 ***      | 25.2 ± 3.4 *   | 21.9 ± 1.9 ***       | 4.6 ± 1.0 *    | 1.7 ± 0.2 ***                         | 0.9 ± 0.2      | 67.8 ± 31.7 **   | 24.4 ± 6.8      |
| SIPERNAT® 50   | 0       | 13.4 ± 2.7           | 14.5 ± 3.0     | 1.7 ± 0.5            | 1.7 ± 1.7      | 0.9 ± 0.2                             | 0.8 ± 0.1      | 14.3 ± 14.7      | 16.7 ± 8.9      |
|                | 11.25   | 14.9 ± 2.7           | 14.8 ± 2.3     | 1.6 ± 0.2            | 1.7 ± 0.7      | 1.2 ± 0.1                             | 0.5 ± 0.6      | 15.8 ± 8.9       | 17.9 ± 10.3     |
|                | 22.5    | 23.3 ± 4.4 **        | 15.9 ± 2.3     | 2.4 ± 0.6            | 2.0 ± 1.0      | 1.4 ± 0.1                             | 0.5 ± 0.7      | 32.9 ± 19.9      | 16.3 ± 5.4      |
|                | 45      | 64.9 ± 1.1 ***       | 18.5 ± 3.2     | 7.9 ± 0.9 ***        | 2.8 ± 1.3      | 1.8 ± 0.1 *                           | 0.8 ± 0.3      | 90.0 ± 36.8 **   | 20.9 ± 10.6     |
|                | 90      | 91.4 ± 1.9 ***       | 23.9 ± 4.6 **  | 15.5 ± 0.3 ***       | 4.5 ± 2.2 *    | 2.2 ± 0.2 ***                         | 1.0 ± 0.2      | 97.0 ± 51.1 ***  | 22.5 ± 10.7     |
| SIPERNAT® 160  | 0       | 13.4 ± 2.7           | 14.5 ± 3.0     | 1.7 ± 0.5            | 1.7 ± 1.7      | 0.9 ± 0.2                             | 0.8 ± 0.1      | 14.3 ± 14.7      | 16.7 ± 8.9      |
|                | 11.25   | 19.1 ± 2.1 *         | 14.3 ± 2.1     | 1.8 ± 0.3            | 1.3 ± 0.8      | 1.0 ± 0.2                             | 0.6 ± 0.6      | 19.9 ± 10.7      | 14.6 ± 5.5      |
|                | 22.5    | 78.2 ± 1.0 ***       | 16.8 ± 2.0     | 9.7 ± 0.5 ***        | 2.0 ± 0.8      | 1.3 ± 0.1                             | 0.4 ± 0.9      | 38.5 ± 15.5      | 14.0 ± 5.0      |
|                | 45      | 102.5 ± 1.7 ***      | 24.7 ± 2.3 *** | 18.5 ± 0.2 ***       | 3.3 ± 0.8      | 1.6 ± 0.2                             | 0.6 ± 0.5      | 77.0 ± 24.8 **   | 20.7 ± 9.9      |
|                | 90      | 92.6 ± 2.7 ***       | 50.3 ± 3.1 *** | 17.3 ± 1.4 ***       | 9.9 ± 2.1 ***  | 1.9 ± 0.2 *                           | 0.8 ± 0.4      | 82.5 ± 40.1 ***  | 30.3 ± 7.2      |
| Corundum       | 0       | 13.2 ± 2.3           | 16.1 ± 2.9     | 1.7 ± 0.4            | 1.7 ± 0.4      | 1.1 ± 0.3                             | 0.9 ± 0.1      | 15.3 ± 11.9      | 16.5 ± 6.8      |
|                | 22.5    | 13.6 ± 2.5           | 12.9 ± 1.9     | 2.1 ± 0.7            | 1.5 ± 2.3      | 1.1 ± 0.2                             | 0.9 ± 0.1      | 11.6 ± 7.8       | 12.8 ± 8.4      |
|                | 45      | 15.1 ± 3.4           | 15.3 ± 1.9     | 1.8 ± 0.6            | 1.5 ± 2.1      | 1.2 ± 0.2                             | 1.0 ± 0.1      | 12.2 ± 7.1       | 12.9 ± 7.4      |
|                | 90      | 18.0 ± 3.3           | 17.2 ± 1.5     | 2.0 ± 1.0            | 2.2 ± 1.5      | 1.1 ± 0.3                             | 1.0 ± 0.1      | 12.9 ± 10.0      | 14.3 ± 8.4      |
|                | 180     | 21.5 ± 2.9 *         | 18.9 ± 1.3     | 2.6 ± 0.8            | 3.4 ± 1.0      | 1.7 ± 0.3 **                          | 1.2 ± 0.1      | 15.2 ± 13.4      | 11.9 ± 6.1      |
| Quartz DQ12    | 0       | 13.2 ± 2.3           | 16.1 ± 2.9     | 1.7 ± 0.4            | 1.7 ± 0.4      | 1.1 ± 0.3                             | 0.9 ± 0.1      | 15.3 ± 11.9      | 16.5 ± 6.8      |
|                | 22.5    | 12.3 ± 2.2           | 13.3 ± 0.9     | 1.8 ± 0.3            | 2.3 ± 1.4      | 1.1 ± 0.3                             | 0.9 ± 0.1      | 12.8 ± 8.2       | 14.2 ± 7.8      |
|                | 45      | 15.8 ± 3.1           | 15.4 ± 1.3     | 2.0 ± 0.6            | 3.2 ± 1.9      | 1.2 ± 0.3                             | 0.9 ± 0.1      | 13.7 ± 10.6      | 14.4 ± 4.1      |
|                | 90      | 34.6 ± 7.8 ***       | 28.9 ± 4.2 *** | 4.4 ± 1.6            | 7.2 ± 2.7 **   | 0.9 ± 0.4                             | 1.0 ± 0.2      | 38.8 ± 25.8      | 34.6 ± 8.8      |
|                | 180     | 78.7 ± 9.9 ***       | 61.9 ± 5.6 *** | 15.4 ± 4.2 ***       | 20.3 ± 3.5 *** | 2.0 ± 0.3 ***                         | 1.1 ± 0.2      | 101.2 ± 35.9 *** | 99.1 ± 16.8 *** |
| Zymosan        | 360     | -                    | -              | -                    | -              | 15.2 ± 0.4 ***                        | 11.6 ± 0.7 *** | -                | -               |
| LPS            | 0.5     | -                    | -              | -                    | -              | -                                     | -              | 1153 ± 214 ***   | 2634 ± 55.4 *** |

Footnote to Table S3. LDH: lactate dehydrogenase, GLU: glucuronidase, H<sub>2</sub>O<sub>2</sub>: hydrogen peroxide, TNF: tumor necrosis factor α, LPS: lipopolysaccharide. \* Level of significance is shown by asterisks with \*:  $P < 0.05$ , \*\*:  $P < 0.01$ , and \*\*\*:  $P < 0.001$ .

**Table S4.** EC50 values for the release of LDH, GLU and TNF $\alpha$  calculated for cell-associated SAS.

| Particle Name             | LDH               |                            | GLU                |                            | TNF $\alpha$      |                            |
|---------------------------|-------------------|----------------------------|--------------------|----------------------------|-------------------|----------------------------|
|                           | EC50<br>[pg/cell] | Goodness<br>of<br>Fit (R2) | EC50<br>[pg/ cell] | Goodness<br>of<br>Fit (R2) | EC50<br>[pg/cell] | Goodness<br>of<br>Fit (R2) |
| SIPERNAT <sup>®</sup> 160 | 6.38 (15.5)       | 0.992                      | 7.87 (19.4)        | 0.997                      | 9.26              | 0.998                      |
| SIPERNAT <sup>®</sup> 50  | 10.60 (31.7)      | 0.998                      | 13.61(36.3)        | 0.993                      | 7.86              | 1.000                      |
| AEROSIL <sup>®</sup> OX50 | 28.00 (22.7)      | 1.000                      | 33.61(36.5)        | 0.999                      | 17.16             | 0.967                      |
| AEROSIL <sup>®</sup> 380F | 2.03 (13.2)       | 0.998                      | 2.50 (14.0)        | 1.000                      | 1.67              | 0.993                      |

Footnote to Table S4. Values were non-linear fittings from the curves shown in Figure 8 using GraphPad Prism 8 Software. Italic values in brackets are EC50 values previously determined in  $\mu\text{g/mL}$  [18].

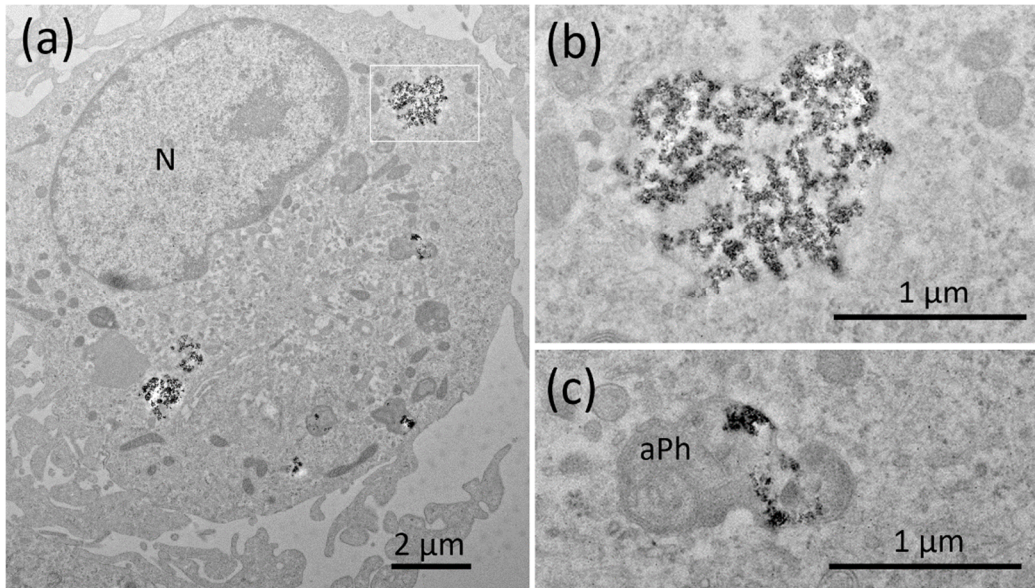

**Figure S1.** Electron microscopy of NR8383 cells laden with SIPERNAT® 50 in the absence of FCS for 16 h. (a) Overview of a cell with particle-containing phagosomes (large arrows), autophagosomes (aPh) and lysosomes; N: nucleus; the white box is enlarged in (b) and shows a particle-filled phagosome; (c) an autophagosomes with condensed particulates (aPh).

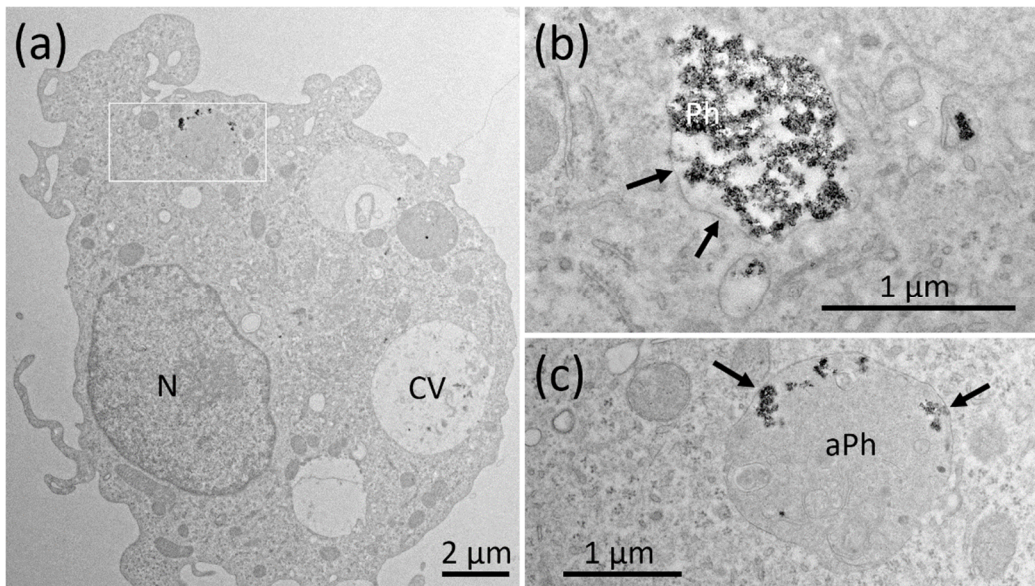

**Figure S2.** Electron microscopy of NR8383 cells laden with SIPERNAT® 50 in the presence of FCS for 16 h. (a) Overview of a cell with particle-containing autophagosome; CV: clear vesicle; N: nucleus. (b) particle-filled phagosome (Ph); the white box in (a) is enlarged in (c) and shows an autophagosome (aPh) with condense particulates. Arrows in (b) and (c) point to continuous membranes of the particle-containing vesicles.

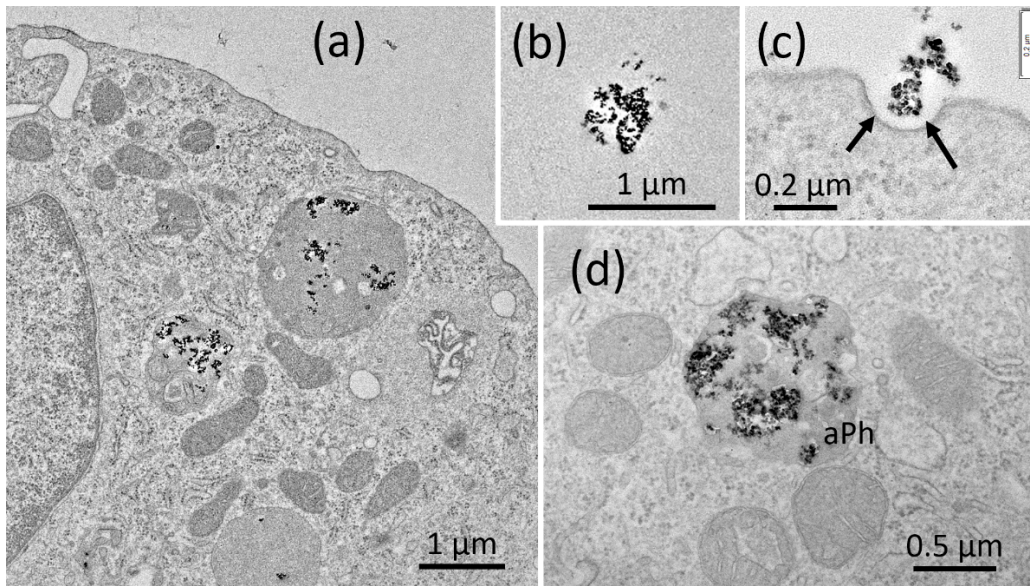

**Figure S3.** Electron microscopy of NR8383 cells laden with SIPERNAT® 160 in the absence of FCS for 16 h. (a) Section of a cell with particle-containing vesicles. Extracellular aggregates/agglomerates of SIPERNAT® 160 in the medium (b), and (c) close to the cell membrane during beginning endosome formation (large arrows). (d) Autophagosome (aPh) partly filled with particles aggregates/agglomerates.

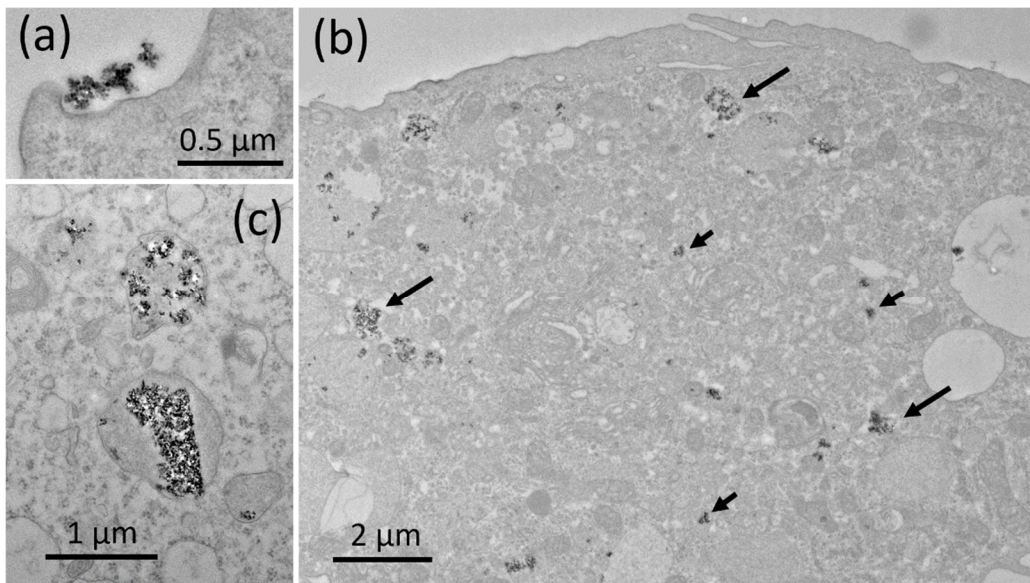

**Figure S4.** Electron microscopy of NR8383 cells laden with SIPERNAT® 160 in the presence of FCS for 16 h. (a) Extracellular aggregates/agglomerates of SIPERNAT® 160 close to the cell membrane during early endosome formation. (b) Section of a cell with particle-containing phagosomes (large arrows) and numerous small particle deposits in endosomes (small arrows), lysosomes and autophagosomes. (c) Aggregates/agglomerates of SIPERNAT® 160 lysosomes.
